# Supplementary material for: Anticipatory guidance to prevent infant sleep problems within a randomised controlled trial: infant, maternal and partner outcomes at 6 months of age
Source: PubMed Central journal article supplement — BMJ Open. 2017 Jun 2;7(5):e014908. doi: 10.1136/bmjopen-2016-014908 (PMC5623410; doi:10.1136/bmjopen-2016-014908), 2017-06-02
Supplement: bmjopen-2016-014908supp001.pdf [file bmjopen-2016-014908supp001.pdf]

## **Appendix 1.** Topics covered at the antenatal group session for the Sleep and Combination groups

### **Why sleep?**

- Critical to a child's development, health and quality of life
- Good for parents' wellbeing and more

### **What's normal**

- Waking frequently during the night
- Active and quiet sleep cycles
- Sleeping through the night – a milestone to look forward to
- Babies can learn their sleep routines
- Babies need to be given a chance to learn to settle themselves
- Some babies learn easily – others need more help

### **Healthy sleep patterns**

- Try to set some limits on 'handling' of baby
- Establish some regular pattern
- Notice and act on baby's tired signs early
- Darken sleeping place day and night ('cue' for sleep time)
- Try to put baby into their bed awake
- Give baby a brief chance to settle by themselves/learn to go to sleep on their own
- Keep night time quiet time – no 'play'

### **Safe sleeping**

- Own sleep place in your room
- On back
- Clean firm tightly fitting mattress
- Keep cot clear of "extras"
- Co-sleeping is unsafe
  - If mother smoked in pregnancy
  - Adults (either) have been drinking, taking drugs, sedatives
  - Baby is less than 3 months old (for smoking and non-smoking mothers)

### **Looking after yourselves**

- Your rest and sleep is important too
- Try to get a rest/sleep during the day
- Meals in freezer
- Limit visitors and looking after them
- Accept offers of help
- Go to bed early...soon after baby
